# Supplementary material for: Bacterial community structure transformed after thermophilically composting human waste in Haiti
Source: PLoS One. 2017 Jun 1;12(6):e0177626. doi: 10.1371/journal.pone.0177626 (PMC5453478; doi:10.1371/journal.pone.0177626)
Supplement: S2 Table — Bar lengths represent values ranging from 10 to 15,860 fluorescence intensity units. (XLSX) [file pone.0177626.s003.xlsx]

## Sheet: Table S2 Port-au-Prince
S2 Table. PhyloChip probe intensity values (averages) for OTU with the greatest changes during thermophilic composting of human waste at Port-au-Prince, Haiti. Bar lengths represent values ranging from 10 to 15,860 fluorescence intensity units.
Unique taxa	Taxa	Average Bucket	Average Thermo	Average Curing	Average Bagged
1	p__Acidobacteria c__Acidobacteria o__Acidobacteriales f__Acidobacteriaceae g__unclassified s__unclassified_1	4777.45	3889.09	11250.7	12239.2
2	p__Acidobacteria c__Acidobacteria o__Acidobacteriales f__Acidobacteriaceae g__unclassified s__unclassified_2	3715.36	3216.02	7593.86	9348.63
3	p__Acidobacteria c__RB25 o__unclassified f__unclassified g__sfA s__unclassified	3446.56	4427.03	5277.57	6866.63
4	p__Actinobacteria c__Actinobacteria o__Acidimicrobiales f__Acidimicrobiaceae g__unclassified s__unclassified	4018.14	7361.49	11324	10823.3
5	p__Actinobacteria c__Actinobacteria o__Actinomycetales f__Actinomycetaceae g__Actinomyces s__unclassified	2887.56	5739.71	10640.1	8848.31
6	p__Actinobacteria c__Actinobacteria o__Actinomycetales f__Cellulomonadaceae g__unclassified s__unclassified_1	2056.22	2211.51	7550.39	4208.84
7	p__Actinobacteria c__Actinobacteria o__Actinomycetales f__Cellulomonadaceae g__unclassified s__unclassified_2	1908.46	4677.63	10334.8	9382.43
8	p__Actinobacteria c__Actinobacteria o__Actinomycetales f__Corynebacteriaceae g__Corynebacterium s__unclassified_1	15459.7	13248.5	12062.9	10013
9	p__Actinobacteria c__Actinobacteria o__Actinomycetales f__Corynebacteriaceae g__Corynebacterium s__unclassified_2	5241.27	3945.93	10423.9	10105.2
10	p__Actinobacteria c__Actinobacteria o__Actinomycetales f__Corynebacteriaceae g__Corynebacterium s__unclassified_3	6045.62	7419.41	6988.67	4929.7
11	p__Actinobacteria c__Actinobacteria o__Actinomycetales f__Corynebacteriaceae g__Corynebacterium s__unclassified_4	9670.84	10896.8	9727.7	7302.54
12	p__Actinobacteria c__Actinobacteria o__Actinomycetales f__Corynebacteriaceae g__unclassified s__unclassified	3722.12	5962.92	13331	8697.15
13	p__Actinobacteria c__Actinobacteria o__Actinomycetales f__Frankiaceae g__Frankia s__unclassified	3349.14	6996.69	9374.03	8262.99
14	p__Actinobacteria c__Actinobacteria o__Actinomycetales f__Geodermatophilaceae g__Geodermatophilus s__unclassified	2185.46	4957.69	9157.59	8100.04
15	p__Actinobacteria c__Actinobacteria o__Actinomycetales f__Microbacteriaceae g__Agromyces s__unclassified_1	3236.64	3076.7	9309.43	7349.02
16	p__Actinobacteria c__Actinobacteria o__Actinomycetales f__Microbacteriaceae g__Agromyces s__unclassified_2	4901.25	7978.95	10033.1	8338.79
17	p__Actinobacteria c__Actinobacteria o__Actinomycetales f__Microbacteriaceae g__Microbacterium s__unclassified	3388.6	3050.46	10168.2	7790.4
18	p__Actinobacteria c__Actinobacteria o__Actinomycetales f__Micrococcaceae g__Arthrobacter s__unclassified	7134.7	6677.84	13747.9	12604.8
19	p__Actinobacteria c__Actinobacteria o__Actinomycetales f__Micromonosporaceae g__unclassified s__unclassified_1	967.409	1613.45	8030.74	6206.63
20	p__Actinobacteria c__Actinobacteria o__Actinomycetales f__Micromonosporaceae g__unclassified s__unclassified_2	2847.35	5224.61	10886.7	9151.7
21	p__Actinobacteria c__Actinobacteria o__Actinomycetales f__Micromonosporaceae g__unclassified s__unclassified_3	767.904	4186.35	10001	9842.37
22	p__Actinobacteria c__Actinobacteria o__Actinomycetales f__Micromonosporaceae g__unclassified s__unclassified_4	1861.95	3149.8	8455.43	9062.31
23	p__Actinobacteria c__Actinobacteria o__Actinomycetales f__Mycobacteriaceae g__Mycobacterium s__unclassified	2171.57	3553.27	9592.41	8310.43
24	p__Actinobacteria c__Actinobacteria o__Actinomycetales f__Nakamurellaceae g__unclassified s__unclassified	221.965	198.335	4582.55	2337.73
25	p__Actinobacteria c__Actinobacteria o__Actinomycetales f__Nocardiaceae g__Nocardia s__unclassified	1272.28	2190.2	8722.35	6395.09
26	p__Actinobacteria c__Actinobacteria o__Actinomycetales f__Nocardiopsaceae g__Nocardiopsis s__unclassified	1717.95	5084.96	7046.81	6232.64
27	p__Actinobacteria c__Actinobacteria o__Actinomycetales f__Nocardiopsaceae g__Streptomonospora s__unclassified	1638.62	6107.09	8977.22	7657.91
28	p__Actinobacteria c__Actinobacteria o__Actinomycetales f__Nocardiopsaceae g__Thermobifida s__Thermobifida fusca	3328.64	14048.7	14325.4	12700.8
29	p__Actinobacteria c__Actinobacteria o__Actinomycetales f__Promicromonosporaceae g__Isoptericola s__Isoptericola variabilis	1747.51	2247.52	10722.8	8856.15
30	p__Actinobacteria c__Actinobacteria o__Actinomycetales f__Pseudonocardiaceae g__Pseudonocardia s__unclassified	2092.71	2496.1	8515.03	8979.56
31	p__Actinobacteria c__Actinobacteria o__Actinomycetales f__Pseudonocardiaceae g__Saccharomonospora s__unclassified	2118.36	7296.13	11729.1	11204.6
32	p__Actinobacteria c__Actinobacteria o__Actinomycetales f__Pseudonocardiaceae g__unclassified s__unclassified	660.58	2128.02	7160.43	7004.66
33	p__Actinobacteria c__Actinobacteria o__Actinomycetales f__Streptomycetaceae g__Streptomyces s__unclassified_1	5859.94	6341.66	9286.21	6534.36
34	p__Actinobacteria c__Actinobacteria o__Actinomycetales f__Streptomycetaceae g__Streptomyces s__unclassified_2	3960.26	6102.3	12616.5	10823.3
35	p__Actinobacteria c__Actinobacteria o__Actinomycetales f__Streptomycetaceae g__Streptomyces s__unclassified_3	1362.66	2074.06	8466.13	7335.52
36	p__Actinobacteria c__Actinobacteria o__Actinomycetales f__Streptomycetaceae g__Streptomyces s__unclassified_4	1185.85	1510.36	6690.4	7632.84
37	p__Actinobacteria c__Actinobacteria o__Actinomycetales f__Streptosporangiaceae g__Streptosporangium s__unclassified	909.139	4139.77	6895.71	6506.18
38	p__Actinobacteria c__Actinobacteria o__Actinomycetales f__Streptosporangiaceae g__unclassified s__unclassified	1073.79	2896.4	9112.93	9472.17
39	p__Actinobacteria c__Actinobacteria o__Actinomycetales f__Thermomonosporaceae g__Actinomadura s__Actinomadura vinacea	676.088	1808.05	7015.19	7077.27
40	p__Actinobacteria c__Actinobacteria o__Actinomycetales f__Thermomonosporaceae g__Actinomadura s__unclassified_1	2469.09	4350.69	11144.5	9659.26
41	p__Actinobacteria c__Actinobacteria o__Actinomycetales f__Thermomonosporaceae g__Actinomadura s__unclassified_2	819.347	2425.24	8058.65	7719.44
42	p__Actinobacteria c__Actinobacteria o__Actinomycetales f__Thermomonosporaceae g__Actinomadura s__unclassified_3	2157.08	4310.01	11398.7	10541
43	p__Actinobacteria c__Actinobacteria o__MC47 f__unclassified g__sfA s__unclassified	7744.83	11288.1	15567.6	15101.5
44	p__Actinobacteria c__Actinobacteria o__Solirubrobacterales f__Solirubrobacteraceae g__Solirubrobacter s__unclassified	2464.4	2141.91	4892.06	6286.46
45	p__Actinobacteria c__Actinobacteria o__unclassified f__unclassified g__sfF s__unclassified	3488.58	7577.88	8534.95	7321.38
46	p__Bacteroidetes c__Bacteroidia o__Bacteroidales f__Bacteroidaceae g__Bacteroides s__Bacteroides ovatus	2455.41	189.933	25.0057	26.4099
47	p__Bacteroidetes c__Bacteroidia o__Bacteroidales f__Bacteroidaceae g__Bacteroides s__unclassified	2808.63	471.002	31.6934	29.7076
48	p__Bacteroidetes c__Bacteroidia o__Bacteroidales f__Porphyromonadaceae g__Parabacteroides s__Parabacteroides distasonis	5256.7	459.618	67.3847	37.1133
49	p__Bacteroidetes c__Bacteroidia o__Bacteroidales f__Porphyromonadaceae g__unclassified s__unclassified	7958.76	4983.74	3838.62	2275.88
50	p__Bacteroidetes c__Bacteroidia o__Bacteroidales f__Prevotellaceae g__Prevotella s__unclassified_1	598.766	53.4355	26.2541	13.5507
51	p__Bacteroidetes c__Bacteroidia o__Bacteroidales f__Prevotellaceae g__Prevotella s__unclassified_2	1748.89	172.675	451.919	404.619
52	p__Bacteroidetes c__Bacteroidia o__Bacteroidales f__RikenellaceaeII g__unclassified s__unclassified_1	7049.37	3668.49	1463.14	1136.08
53	p__Bacteroidetes c__Bacteroidia o__Bacteroidales f__RikenellaceaeII g__unclassified s__unclassified_2	3543.27	2757.78	4715.32	1955.86
54	p__Bacteroidetes c__Bacteroidia o__Bacteroidales f__RikenellaceaeII g__unclassified s__unclassified_3	4208.89	3189.3	9420.32	8121.85
55	p__Bacteroidetes c__Flavobacteria o__Flavobacteriales f__Corymorphaceae g__unclassified s__unclassified	10000.3	6017.02	11013.8	7473.84
56	p__Bacteroidetes c__Flavobacteria o__Flavobacteriales f__Flavobacteriaceae g__Chryseobacterium s__unclassified	4143.31	1908.78	5474.3	2600.79
57	p__Bacteroidetes c__Flavobacteria o__Flavobacteriales f__Flavobacteriaceae g__Flavobacterium s__Flavobacterium columnare	6962.26	5126.19	7341.79	4809.58
58	p__Bacteroidetes c__Flavobacteria o__Flavobacteriales f__Flavobacteriaceae g__Flavobacterium s__unclassified_1	5593.11	499.325	419.925	79.554
59	p__Bacteroidetes c__Flavobacteria o__Flavobacteriales f__Flavobacteriaceae g__Flavobacterium s__unclassified_2	9668.3	4041.69	7166.46	3729.71
60	p__Bacteroidetes c__Flavobacteria o__Flavobacteriales f__Flavobacteriaceae g__unclassified s__unclassified	7107.72	3757.78	7205.36	4413.07
61	p__Bacteroidetes c__Sphingobacteria o__Sphingobacteriales f__Chitinophagaceae g__unclassified s__unclassified_1	2255.43	1738.63	6919.98	3030.22
62	p__Bacteroidetes c__Sphingobacteria o__Sphingobacteriales f__Chitinophagaceae g__unclassified s__unclassified_2	4948.57	3803.43	10038.8	6495.58
63	p__Bacteroidetes c__Sphingobacteria o__Sphingobacteriales f__Flammeovirgaceae g__unclassified s__unclassified	3473.4	1970.24	4993.62	6355.78
64	p__Bacteroidetes c__Sphingobacteria o__Sphingobacteriales f__Flexibacteraceae g__Cytophaga s__unclassified	5030.99	6482.08	13136.8	13316.1
65	p__Bacteroidetes c__Sphingobacteria o__Sphingobacteriales f__Flexibacteraceae g__Hymenobacter s__unclassified	2336.82	2190.28	5509.54	2694.91
66	p__Bacteroidetes c__Sphingobacteria o__Sphingobacteriales f__Flexibacteraceae g__unclassified s__unclassified	8836.6	5438.5	7482.82	4809.59
67	p__Bacteroidetes c__Sphingobacteria o__Sphingobacteriales f__Sphingobacteriaceae g__Sphingobacterium s__unclassified	3888.4	3498.6	2227.83	646.872
68	p__Bacteroidetes c__Sphingobacteria o__Sphingobacteriales f__Sphingobacteriaceae g__unclassified s__unclassified	263.12	151.515	5058.76	146.034
69	p__Chloroflexi c__Anaerolineae o__Anaerolineales f__Anaerolinaceae g__A4b s__unclassified	2699.9	5724.3	10419.2	8550.52
70	p__Chloroflexi c__Caldilineae o__Caldilineales f__Caldilineaceae g__Caldilinea s__unclassified	1536.85	2890.74	7064.37	8022.93
71	p__Chloroflexi c__Chloroflexi o__Chloroflexales f__Chloroflexaceae g__Roseiflexus s__unclassified	965.733	2303.59	3257.36	6359.15
72	p__Chloroflexi c__Thermomicrobia o__Sphaerobacterales/Thermomicrobiales f__Sphaerobacterineae/Thermomicrobiaceae g__Thermomicrobium/Sphaerobacter s__unclassified	184.067	3908.54	11159.9	9467.77
73	p__Cyanobacteria c__4C0d-2 o__YS2 f__unclassified g__sfA s__unclassified	3512.8	3139.64	3289.97	4930.6
74	p__Firmicutes c__Bacilli o__Bacillales f__Alicyclobacillaceae g__Alicyclobacillus s__unclassified	8173.49	11856.6	11812.8	10536.3
75	p__Firmicutes c__Bacilli o__Bacillales f__Bacillaceae g__Bacillus s__Bacillus badius	4753.04	5229.02	8155.14	5084.03
76	p__Firmicutes c__Bacilli o__Bacillales f__Bacillaceae g__Bacillus s__Bacillus fumarioli	4157.62	7458.25	9364.54	7007.15
77	p__Firmicutes c__Bacilli o__Bacillales f__Bacillaceae g__Bacillus s__Bacillus pocheonensis	2804.94	5945.95	6288.06	4764.81
78	p__Firmicutes c__Bacilli o__Bacillales f__Bacillaceae g__Bacillus s__Bacillus pseudofirmus	6192.63	10169.5	10633.7	8342.31
79	p__Firmicutes c__Bacilli o__Bacillales f__Bacillaceae g__Bacillus s__unclassified_1	4732.07	4984.69	8423.34	5820.13
80	p__Firmicutes c__Bacilli o__Bacillales f__Bacillaceae g__Bacillus s__unclassified_2	2806.13	7339.6	7311.88	5807.57
81	p__Firmicutes c__Bacilli o__Bacillales f__Bacillaceae g__Bacillus s__unclassified_3	3834.72	6591.61	8521.8	6690.8
82	p__Firmicutes c__Bacilli o__Bacillales f__Bacillaceae g__Bacillus s__unclassified_4	2834.97	3416.21	6705.19	8304.76
83	p__Firmicutes c__Bacilli o__Bacillales f__Bacillaceae g__Geobacillus s__unclassified_1	2017.03	6413.45	5446.79	5794.75
84	p__Firmicutes c__Bacilli o__Bacillales f__Bacillaceae g__Geobacillus s__unclassified_2	4198.7	8832.98	8994.35	7499.69
85	p__Firmicutes c__Bacilli o__Bacillales f__Bacillaceae g__Geobacillus s__unclassified_3	2767.35	6701.64	6244.77	6052.68
86	p__Firmicutes c__Bacilli o__Bacillales f__Bacillaceae g__Geobacillus s__unclassified_4	742.858	5284.81	5891.19	4877.92
87	p__Firmicutes c__Bacilli o__Bacillales f__Bacillaceae g__Geobacillus s__unclassified_5	3405.54	8426.16	10284.2	9356.79
88	p__Firmicutes c__Bacilli o__Bacillales f__Bacillaceae g__Natronobacillus s__Natronobacillus azotifigens	3033.07	7634.02	7498.1	5536.44
89	p__Firmicutes c__Bacilli o__Bacillales f__Bacillaceae g__Oceanobacillus s__unclassified	3673.33	8099.1	9775.34	7410.97
90	p__Firmicutes c__Bacilli o__Bacillales f__Bacillaceae g__unclassified s__unclassified_1	1266.04	9166.87	7234.7	7212.6
91	p__Firmicutes c__Bacilli o__Bacillales f__Bacillaceae g__unclassified s__unclassified_2	2820.69	6829.33	7008.82	5752.69
92	p__Firmicutes c__Bacilli o__Bacillales f__Bacillaceae g__unclassified s__unclassified_3	1018	3767.71	5559.77	3451.69
93	p__Firmicutes c__Bacilli o__Bacillales f__Bacillaceae g__unclassified s__unclassified_4	5516.96	9488.21	10694.4	9346.58
94	p__Firmicutes c__Bacilli o__Bacillales f__Paenibacillaceae g__Paenibacillus s__Paenibacillus barengoltzii	2439.3	2493.4	7830.88	9088.41
95	p__Firmicutes c__Bacilli o__Bacillales f__Paenibacillaceae g__Paenibacillus s__unclassified_1	638.642	9337.13	9754.82	7249.61
96	p__Firmicutes c__Bacilli o__Bacillales f__Paenibacillaceae g__Paenibacillus s__unclassified_2	2584.96	4600.05	10151.6	8677.72
97	p__Firmicutes c__Bacilli o__Bacillales f__Paenibacillaceae g__Paenibacillus s__unclassified_3	2067	6062.69	6723.84	5900.76
98	p__Firmicutes c__Bacilli o__Bacillales f__Paenibacillaceae g__Paenibacillus s__unclassified_4	5386.18	8378.3	11359.9	9819.56
99	p__Firmicutes c__Bacilli o__Bacillales f__Planococcaceae g__Lysinibacillus s__unclassified	7478.52	8701.51	8098.36	5656.76
100	p__Firmicutes c__Bacilli o__Bacillales f__Planococcaceae g__Sporosarcina s__Sporosarcina aquimarina	5317.38	5108.15	8308.1	5546.47
101	p__Firmicutes c__Bacilli o__Bacillales f__Planococcaceae g__unclassified s__unclassified_1	8522.97	9293.92	12542.9	10029
102	p__Firmicutes c__Bacilli o__Bacillales f__Planococcaceae g__unclassified s__unclassified_2	4373.45	6294.44	8620.97	6810.78
103	p__Firmicutes c__Bacilli o__Bacillales f__Planococcaceae g__Ureibacillus s__unclassified	3881.26	8555.15	8669.43	7516.29
104	p__Firmicutes c__Bacilli o__Bacillales f__Planococcaceae g__Ureibacillus s__Ureibacillus thermosphaericus	2675.51	6580.71	6146.8	5244.94
105	p__Firmicutes c__Bacilli o__Bacillales f__Staphylococcaceae g__Staphylococcus s__Staphylococcus epidermidis	5850.83	6493.8	5305.55	3540.87
106	p__Firmicutes c__Bacilli o__Bacillales f__Thermoactinomycetaceae g__Planifilum s__Planifilum fulgidum	2658.16	6543.91	8520.53	6625.81
107	p__Firmicutes c__Bacilli o__Bacillales f__Thermoactinomycetaceae g__Planifilum s__unclassified	2910.14	7465.42	10500.9	8305.26
108	p__Firmicutes c__Bacilli o__Bacillales f__Thermoactinomycetaceae g__Thermoactinomyces s__unclassified	2186.03	5876.54	7217.98	6275.35
109	p__Firmicutes c__Bacilli o__Bacillales f__unclassified g__sfA s__unclassified	4716.51	7927.23	8797.21	7559.86
110	p__Firmicutes c__Bacilli o__Lactobacillales f__Enterococcaceae g__Enterococcus s__Enterococcus faecalis	11836.2	13074.4	10330.8	8719.45
111	p__Firmicutes c__Bacilli o__Lactobacillales f__Enterococcaceae g__Enterococcus s__unclassified	5253.36	4919.63	2100.9	1981.62
112	p__Firmicutes c__Bacilli o__Lactobacillales f__Lactobacillaceae g__Lactobacillus s__Lactobacillus ruminis	3216.32	1040.91	102.749	61.2984
113	p__Firmicutes c__Bacilli o__Lactobacillales f__Lactobacillaceae g__Lactobacillus s__unclassified	5800.15	6612.74	5120.79	3698.73
114	p__Firmicutes c__Bacilli o__Lactobacillales f__Streptococcaceae g__Streptococcus s__Streptococcus salivarius_1	9445.51	9143.2	7569.37	6029.67
115	p__Firmicutes c__Bacilli o__Lactobacillales f__Streptococcaceae g__Streptococcus s__Streptococcus salivarius_2	2368.83	3312.99	850.625	816.784
116	p__Firmicutes c__Bacilli o__Lactobacillales f__Streptococcaceae g__Streptococcus s__unclassified_1	1934.75	2150.91	106.142	75.0068
117	p__Firmicutes c__Bacilli o__Lactobacillales f__Streptococcaceae g__Streptococcus s__unclassified_2	2228.2	3077.63	726.294	626.341
118	p__Firmicutes c__Bacilli o__Lactobacillales f__Streptococcaceae g__Streptococcus s__unclassified_3	3373.25	4642.73	2659.79	1839.37
119	p__Firmicutes c__Bacilli o__Lactobacillales f__Streptococcaceae g__Streptococcus s__unclassified_4	7273.46	7890.89	6082.74	4758.82
120	p__Firmicutes c__Bacilli o__Thermicanales f__Thermicanaceae g__Thermicanus s__unclassified	5384.55	5483.75	3598.64	2252.11
121	p__Firmicutes c__Bacilli o__Turicibacterales f__Turicibacteraceae g__Turicibacter s__unclassified	4615.7	9355.45	7033.92	5753.53
122	p__Firmicutes c__Clostridia o__Clostridiales f__Catabacteriaceae g__unclassified s__unclassified	4205.82	128.44	241.584	197.213
123	p__Firmicutes c__Clostridia o__Clostridiales f__Clostridiaceae g__Clostridium s__unclassified_1	5945.8	5031.47	3390.35	4973.93
124	p__Firmicutes c__Clostridia o__Clostridiales f__Clostridiaceae g__Clostridium s__unclassified_2	5867.79	4814.61	6332.64	7929.65
125	p__Firmicutes c__Clostridia o__Clostridiales f__Clostridiaceae g__Clostridium s__unclassified_3	4904.81	4960.1	2744.73	3404.61
126	p__Firmicutes c__Clostridia o__Clostridiales f__Clostridiaceae g__Sarcina s__unclassified	7828.57	6459.63	4573.11	6463.13
127	p__Firmicutes c__Clostridia o__Clostridiales f__Clostridiales Family XI. Incertae Sedis g__unclassified s__unclassified	3527.98	7681.04	8872.96	7555.54
128	p__Firmicutes c__Clostridia o__Clostridiales f__Lachnospiraceae g__Blautia s__Ruminococcus obeum	3564.05	1483.5	102.358	72.1947
129	p__Firmicutes c__Clostridia o__Clostridiales f__Lachnospiraceae g__Blautia s__unclassified	5187.29	2542.05	447.18	455.265
130	p__Firmicutes c__Clostridia o__Clostridiales f__Lachnospiraceae g__Clostridium s__unclassified	7657.63	4184	1294.76	1014.53
131	p__Firmicutes c__Clostridia o__Clostridiales f__Lachnospiraceae g__Coprococcus s__Coprococcus eutactus	3186.53	2149.89	101.399	122.549
132	p__Firmicutes c__Clostridia o__Clostridiales f__Lachnospiraceae g__Coprococcus s__unclassified_1	7217	4200.28	1563.72	1259.58
133	p__Firmicutes c__Clostridia o__Clostridiales f__Lachnospiraceae g__Coprococcus s__unclassified_2	7496.24	6497.86	5223.74	3784.86
134	p__Firmicutes c__Clostridia o__Clostridiales f__Lachnospiraceae g__Coprococcus s__unclassified_3	2859.45	1363.35	133.157	142.566
135	p__Firmicutes c__Clostridia o__Clostridiales f__Lachnospiraceae g__Coprococcus s__unclassified_4	2460.79	2784.39	456.564	225.68
136	p__Firmicutes c__Clostridia o__Clostridiales f__Lachnospiraceae g__Eubacterium s__unclassified_1	2759.64	1174.04	86.1499	76.1605
137	p__Firmicutes c__Clostridia o__Clostridiales f__Lachnospiraceae g__Eubacterium s__unclassified_2	7135.87	5142.76	2708.15	2217.73
138	p__Firmicutes c__Clostridia o__Clostridiales f__Lachnospiraceae g__Lachnospira s__unclassified_1	1986.44	1134.92	104.051	65.105
139	p__Firmicutes c__Clostridia o__Clostridiales f__Lachnospiraceae g__Lachnospira s__unclassified_2	5735.43	3551.38	1298.54	1016.59
140	p__Firmicutes c__Clostridia o__Clostridiales f__Lachnospiraceae g__Roseburia s__Eubacterium rectale_1	2880.86	1493.43	139.194	103.644
141	p__Firmicutes c__Clostridia o__Clostridiales f__Lachnospiraceae g__Roseburia s__Eubacterium rectale_2	7280.34	8084.82	6305.83	5063.61
142	p__Firmicutes c__Clostridia o__Clostridiales f__Lachnospiraceae g__Ruminococcus s__unclassified_1	3173.99	1832.03	139.147	171.241
143	p__Firmicutes c__Clostridia o__Clostridiales f__Lachnospiraceae g__Ruminococcus s__unclassified_2	7708.44	4735.27	2035.96	1624.71
144	p__Firmicutes c__Clostridia o__Clostridiales f__Lachnospiraceae g__unclassified s__unclassified_1	2096.27	775.22	16.6686	24.4473
145	p__Firmicutes c__Clostridia o__Clostridiales f__Lachnospiraceae g__unclassified s__unclassified_2	4480.44	1873.92	88.5045	81.9105
146	p__Firmicutes c__Clostridia o__Clostridiales f__Lachnospiraceae g__unclassified s__unclassified_3	7189.96	4146.84	1827.74	1287.37
147	p__Firmicutes c__Clostridia o__Clostridiales f__Lachnospiraceae g__unclassified s__unclassified_4	7622.16	6639.16	4317.14	4861.67
148	p__Firmicutes c__Clostridia o__Clostridiales f__Lachnospiraceae g__unclassified s__unclassified_5	3282.78	3030.81	138.452	127.445
149	p__Firmicutes c__Clostridia o__Clostridiales f__Lachnospiraceae g__unclassified s__unclassified_6	1326.15	2605.3	134.108	119.596
150	p__Firmicutes c__Clostridia o__Clostridiales f__Peptococcaceae g__Desulfotomaculum s__unclassified	3036.53	7230.5	6246.49	5451.02
151	p__Firmicutes c__Clostridia o__Clostridiales f__Ruminococcaceae g__Faecalibacterium s__Faecalibacterium prausnitzii_1	5417.87	905.454	71.4664	44.5089
152	p__Firmicutes c__Clostridia o__Clostridiales f__Ruminococcaceae g__Faecalibacterium s__Faecalibacterium prausnitzii_2	9059.56	1871.49	271.58	187.881
153	p__Firmicutes c__Clostridia o__Clostridiales f__Ruminococcaceae g__Faecalibacterium s__Faecalibacterium prausnitzii_3	9056.74	3993.19	2035.23	1519.55
154	p__Firmicutes c__Clostridia o__Clostridiales f__Ruminococcaceae g__Faecalibacterium s__Faecalibacterium prausnitzii_4	7031.89	2199.37	1688.53	3343.59
155	p__Firmicutes c__Clostridia o__Clostridiales f__Ruminococcaceae g__Faecalibacterium s__Faecalibacterium prausnitzii_5	4601.87	1947.29	1850.48	3264.49
156	p__Firmicutes c__Clostridia o__Clostridiales f__Ruminococcaceae g__Faecalibacterium s__Faecalibacterium prausnitzii_6	6885.01	3722.56	4709	7354.75
157	p__Firmicutes c__Clostridia o__Clostridiales f__Ruminococcaceae g__Faecalibacterium s__unclassified_1	3099.19	245.708	77.288	51.8227
158	p__Firmicutes c__Clostridia o__Clostridiales f__Ruminococcaceae g__Faecalibacterium s__unclassified_2	4864.37	431.662	86.2208	54.4174
159	p__Firmicutes c__Clostridia o__Clostridiales f__Ruminococcaceae g__Faecalibacterium s__unclassified_3	8247.13	1362.7	106.914	65.0926
160	p__Firmicutes c__Clostridia o__Clostridiales f__Ruminococcaceae g__Faecalibacterium s__unclassified_4	10065.3	2513.85	975.883	597.689
161	p__Firmicutes c__Clostridia o__Clostridiales f__Ruminococcaceae g__Faecalibacterium s__unclassified_5	11710.4	7764.91	5482.91	4135.38
162	p__Firmicutes c__Clostridia o__Clostridiales f__Ruminococcaceae g__Faecalibacterium s__unclassified_6	6346.41	2062.99	1833.91	3423.91
163	p__Firmicutes c__Clostridia o__Clostridiales f__Ruminococcaceae g__Faecalibacterium s__unclassified_7	4850.79	5812.44	3437.99	2448.2
164	p__Firmicutes c__Clostridia o__Clostridiales f__Ruminococcaceae g__Oscillospira s__unclassified_1	1527.1	539.234	20.9416	15.4825
165	p__Firmicutes c__Clostridia o__Clostridiales f__Ruminococcaceae g__Oscillospira s__unclassified_2	5905.85	4567.96	1167.53	1022.09
166	p__Firmicutes c__Clostridia o__Clostridiales f__Ruminococcaceae g__Ruminococcus s__Ruminococcus bromii	3653.98	3725.46	1328.76	1180.23
167	p__Firmicutes c__Clostridia o__Clostridiales f__Ruminococcaceae g__Ruminococcus s__unclassified	4030.27	3516.16	931.573	809.479
168	p__Firmicutes c__Clostridia o__Clostridiales f__Ruminococcaceae g__unclassified s__unclassified_1	2571.47	1111	78.3501	93.1777
169	p__Firmicutes c__Clostridia o__Clostridiales f__Ruminococcaceae g__unclassified s__unclassified_2	8547.09	6307.48	3655.25	2825.45
170	p__Firmicutes c__Clostridia o__Clostridiales f__Symbiobacteriaceae g__Symbiobacterium s__Symbiobacterium thermophilum	87.5343	3184.32	5113.69	4959.15
171	p__Firmicutes c__Clostridia o__Clostridiales f__Symbiobacteriaceae g__Symbiobacterium s__unclassified	3863.47	9136.41	9823.96	9216.45
172	p__Firmicutes c__Clostridia o__Clostridiales f__Veillonellaceae g__Dialister s__unclassified	8923.49	5471.79	3495.16	2641.65
173	p__Firmicutes c__Clostridia o__Clostridiales f__Veillonellaceae g__Veillonella s__unclassified	2331.63	2521.24	3343.97	5907.51
174	p__Firmicutes c__Clostridia o__Halanaerobiales f__Halanaerobiaceae g__unclassified s__unclassified	3534.5	6963.66	7362.3	5226.13
175	p__Firmicutes c__Clostridia o__MBA08 f__unclassified g__sfA s__unclassified	6911.85	10223.4	8604.98	8014.4
176	p__Gemmatimonadetes c__Gemmatimonadetes o__Gemmatimonadales f__Gemmatimonadaceae g__unclassified s__unclassified	2838.3	1403.37	6047.06	7179.01
177	p__Gemmatimonadetes c__Gemmatimonadetes o__unclassified f__unclassified g__sfA s__unclassified_1	1522.57	5773.51	10261.5	7989.61
178	p__Gemmatimonadetes c__Gemmatimonadetes o__unclassified f__unclassified g__sfA s__unclassified_2	4801.82	10079.1	13780.3	12337.8
179	p__Gemmatimonadetes c__Gemmatimonadetes o__unclassified f__unclassified g__sfM s__unclassified	8533.9	12416.1	15552.1	14123.9
180	p__LCP-89 c__unclassified o__unclassified f__unclassified g__sfA s__unclassified	2728.61	6079.98	5715.18	4944.52
181	p__Lentisphaerae c__Lentisphaerae o__Victivallales f__Victivallaceae g__unclassified s__unclassified	2343.09	153.908	176.531	84.0529
182	p__Planctomycetes c__Planctomycea o__Gemmatales f__Gemmataceae g__unclassified s__unclassified_1	5732.34	4156.78	12774.2	12835.4
183	p__Planctomycetes c__Planctomycea o__Gemmatales f__Gemmataceae g__unclassified s__unclassified_2	3380.51	4746.22	6062.04	7715.64
184	p__Planctomycetes c__Planctomycea o__Gemmatales f__Isosphaeraceae g__Isosphaera s__unclassified	4434.01	3819.77	13804.5	10044.1
185	p__Planctomycetes c__Planctomycea o__Gemmatales f__Isosphaeraceae g__Singulisphaera s__Singulisphaera acidiphila	3352.97	1871.38	7752.7	7071.2
186	p__Planctomycetes c__Planctomycea o__Gemmatales f__Isosphaeraceae g__unclassified s__unclassified	3469.46	2316.81	10651.5	8149.46
187	p__Planctomycetes c__Planctomycea o__Planctomycetales f__Planctomycetaceae g__A17 s__unclassified	2625.36	2572.95	5914.02	7852.91
188	p__Planctomycetes c__Planctomycea o__Planctomycetales f__Planctomycetaceae g__Planctomyces s__unclassified_1	6549.27	5367.91	13654.3	13235.6
189	p__Planctomycetes c__Planctomycea o__Planctomycetales f__Planctomycetaceae g__Planctomyces s__unclassified_2	2031.41	2946.7	7940.54	10232.9
190	p__Planctomycetes c__Planctomycea o__Planctomycetales f__Planctomycetaceae g__unclassified s__unclassified_1	1607.07	1343.83	3613.8	6304.66
191	p__Planctomycetes c__Planctomycea o__Planctomycetales f__Planctomycetaceae g__unclassified s__unclassified_2	3350.56	3717.59	9233.68	10521.6
192	p__Planctomycetes c__Planctomycea o__Planctomycetales f__Planctomycetaceae g__unclassified s__unclassified_3	8729.51	8873.07	15265.8	15672.4
193	p__Proteobacteria c__Alphaproteobacteria o__Rhizobiales f__Hyphomicrobiaceae g__Devosia s__unclassified_1	4761.6	3871.19	11141.3	7524.8
194	p__Proteobacteria c__Alphaproteobacteria o__Rhizobiales f__Hyphomicrobiaceae g__Devosia s__unclassified_2	10237.9	7449.63	15787.9	14790.7
195	p__Proteobacteria c__Alphaproteobacteria o__Rhizobiales f__Hyphomicrobiaceae g__Pedomicrobium s__unclassified	4274.51	6205.79	12833.4	12382.4
196	p__Proteobacteria c__Alphaproteobacteria o__Rhizobiales f__Hyphomicrobiaceae g__Rhodoplanes s__unclassified	2479.14	2585.07	7382.83	9696.29
197	p__Proteobacteria c__Alphaproteobacteria o__Rhizobiales f__Hyphomicrobiaceae g__unclassified s__unclassified_1	6599.81	4661.42	8125.96	10260.5
198	p__Proteobacteria c__Alphaproteobacteria o__Rhizobiales f__Hyphomicrobiaceae g__unclassified s__unclassified_2	4570.21	4745.72	9550.12	10666.6
199	p__Proteobacteria c__Alphaproteobacteria o__Rhizobiales f__Phyllobacteriaceae g__Parvibaculum s__unclassified	2379.43	1191.63	4353.98	5727.38
200	p__Proteobacteria c__Alphaproteobacteria o__Rhizobiales f__Phyllobacteriaceae g__unclassified s__unclassified	5468.48	6333.7	8624.41	10414.6
201	p__Proteobacteria c__Alphaproteobacteria o__Rhizobiales f__unclassified g__sfA s__unclassified_1	6459.93	4930.85	10603.2	11215
202	p__Proteobacteria c__Alphaproteobacteria o__Rhizobiales f__unclassified g__sfA s__unclassified_2	4003.16	3075.73	5538.01	7182.89
203	p__Proteobacteria c__Alphaproteobacteria o__Rhodospirillales f__Rhodospirillaceae g__unclassified s__unclassified_1	2402.52	1682.83	8018.19	7026.77
204	p__Proteobacteria c__Alphaproteobacteria o__Rhodospirillales f__Rhodospirillaceae g__unclassified s__unclassified_2	944.66	315.819	4559.49	6591.95
205	p__Proteobacteria c__Alphaproteobacteria o__Rhodospirillales f__Rhodospirillaceae g__unclassified s__unclassified_3	5526.8	3741.13	8516.67	10022.1
206	p__Proteobacteria c__Alphaproteobacteria o__Rhodospirillales f__Rhodospirillaceae g__unclassified s__unclassified_4	2674.15	3559.38	7192.86	9480.56
207	p__Proteobacteria c__Alphaproteobacteria o__Rickettsiales f__Rickettsiaceae g__Rickettsia s__Rickettsia akari	1802.98	1848.39	4641.11	7292.58
208	p__Proteobacteria c__Alphaproteobacteria o__Sphingomonadales f__Erythrobacteraceae g__unclassified s__unclassified	3415.37	3331.43	7924.56	9897.38
209	p__Proteobacteria c__Alphaproteobacteria o__Sphingomonadales f__Sphingomonadaceae g__Sphingomonas s__unclassified	4111.22	2195.16	7438.19	4694.05
210	p__Proteobacteria c__Betaproteobacteria o__Burkholderiales f__Alcaligenaceae g__Achromobacter s__unclassified	4461.23	2407.96	5375.56	2194.52
211	p__Proteobacteria c__Betaproteobacteria o__Burkholderiales f__Alcaligenaceae g__Bordetella s__unclassified	4806.03	2821.13	6311.11	2857.13
212	p__Proteobacteria c__Betaproteobacteria o__Burkholderiales f__Alcaligenaceae g__unclassified s__unclassified_1	4893.13	3355.67	6186.78	2579.6
213	p__Proteobacteria c__Betaproteobacteria o__Burkholderiales f__Alcaligenaceae g__unclassified s__unclassified_2	10597.8	6295.58	9640.39	5832.73
214	p__Proteobacteria c__Betaproteobacteria o__Burkholderiales f__Aquabacteriaceae g__Aquabacterium s__unclassified_1	7376.77	4867.72	8804.3	5696.14
215	p__Proteobacteria c__Betaproteobacteria o__Burkholderiales f__Aquabacteriaceae g__Aquabacterium s__unclassified_2	6723.84	4947.16	8355.62	10356.7
216	p__Proteobacteria c__Betaproteobacteria o__Burkholderiales f__Comamonadaceae g__Comamonas s__Comamonas aquatica	11614	1363.35	2231.61	2431.92
217	p__Proteobacteria c__Betaproteobacteria o__Burkholderiales f__Comamonadaceae g__Comamonas s__unclassified	11561.8	1362.21	1626.37	1335.51
218	p__Proteobacteria c__Betaproteobacteria o__Burkholderiales f__Comamonadaceae g__Diaphorobacter s__unclassified	7385.22	3751.46	8235.63	4085.36
219	p__Proteobacteria c__Betaproteobacteria o__Burkholderiales f__Comamonadaceae g__unclassified s__unclassified	2451.21	2553.25	5497.63	2194
220	p__Proteobacteria c__Betaproteobacteria o__Rhodocyclales f__unclassified g__sfA s__unclassified	2136.26	1755.25	4817.57	7310.11
221	p__Proteobacteria c__Deltaproteobacteria o__Myxococcales f__Haliangiaceae g__unclassified s__unclassified	2861.93	5577.19	7810.89	8946.08
222	p__Proteobacteria c__Deltaproteobacteria o__Myxococcales f__Myxococcaceae g__Anaeromyxobacter s__unclassified	2451.19	4195.64	9941.3	9797.88
223	p__Proteobacteria c__Deltaproteobacteria o__Myxococcales f__unclassified g__sfA s__unclassified	1846.38	5280.43	8055.74	7487.05
224	p__Proteobacteria c__Deltaproteobacteria o__Myxococcales f__unclassified g__sfD s__unclassified	4550.44	5494.3	10950.2	12069.6
225	p__Proteobacteria c__Deltaproteobacteria o__Myxococcales f__unclassified g__sfE s__unclassified	1081.8	1102.75	5197.99	10172.5
226	p__Proteobacteria c__Deltaproteobacteria o__Myxococcales f__unclassified g__sfJ s__unclassified	2357.18	5087.12	9404.11	8920.62
227	p__Proteobacteria c__Deltaproteobacteria o__Syntrophobacterales f__Syntrophobacteraceae g__unclassified s__unclassified	5032.45	4662.26	12784.1	13432.2
228	p__Proteobacteria c__Deltaproteobacteria o__unclassified f__unclassified g__sfW s__unclassified	2607	2194.87	6370.39	7913.89
229	p__Proteobacteria c__Gammaproteobacteria o__Aeromonadales f__Aeromonadaceae g__Oceanimonas s__unclassified	1805.96	68.7557	442.838	47.469
230	p__Proteobacteria c__Gammaproteobacteria o__Aeromonadales f__Succinivibrionaceae g__Succinivibrio s__unclassified	8859.06	6546.98	4176.38	3547.43
231	p__Proteobacteria c__Gammaproteobacteria o__Chromatiales f__Chromatiaceae g__unclassified s__unclassified_1	6065.85	4135.46	10090.4	9540.34
232	p__Proteobacteria c__Gammaproteobacteria o__Chromatiales f__Chromatiaceae g__unclassified s__unclassified_2	7404.36	8128.07	13727.6	13728.8
233	p__Proteobacteria c__Gammaproteobacteria o__Chromatiales f__Chromatiaceae g__unclassified s__unclassified_3	1614.83	1591.2	4959.79	6409.99
234	p__Proteobacteria c__Gammaproteobacteria o__Chromatiales f__Sinobacteraceae g__Steroidobacter s__unclassified_1	2476.66	1486.73	6010.05	7694.03
235	p__Proteobacteria c__Gammaproteobacteria o__Chromatiales f__Sinobacteraceae g__Steroidobacter s__unclassified_2	3528.36	4992.65	11123.3	11607.1
236	p__Proteobacteria c__Gammaproteobacteria o__Chromatiales f__Sinobacteraceae g__unclassified s__unclassified_1	3929.8	2322.71	5963.3	10514.6
237	p__Proteobacteria c__Gammaproteobacteria o__Chromatiales f__Sinobacteraceae g__unclassified s__unclassified_2	3579.86	3746.34	9710.36	10927.7
238	p__Proteobacteria c__Gammaproteobacteria o__Chromatiales f__Sinobacteraceae g__unclassified s__unclassified_3	2572.13	5056.79	12112.4	12212.5
239	p__Proteobacteria c__Gammaproteobacteria o__Enterobacteriales f__Enterobacteriaceae g__Escherichia s__unclassified	11112.2	2261.81	2167.17	739.369
240	p__Proteobacteria c__Gammaproteobacteria o__Enterobacteriales f__Enterobacteriaceae g__Shigella s__unclassified	12855	3236.39	3239.6	1163.46
241	p__Proteobacteria c__Gammaproteobacteria o__Enterobacteriales f__Enterobacteriaceae g__unclassified s__unclassified_1	11692.6	2589.45	2158	790.288
242	p__Proteobacteria c__Gammaproteobacteria o__Enterobacteriales f__Enterobacteriaceae g__unclassified s__unclassified_2	12463	2961.35	2935.16	1139.86
243	p__Proteobacteria c__Gammaproteobacteria o__Enterobacteriales f__Enterobacteriaceae g__unclassified s__unclassified_3	15858.8	5297.45	5329.76	2915.39
244	p__Proteobacteria c__Gammaproteobacteria o__Enterobacteriales f__Enterobacteriaceae g__unclassified s__unclassified_4	12857.5	3332.71	3970.42	1734.87
245	p__Proteobacteria c__Gammaproteobacteria o__Oceanospirillales f__Halomonadaceae g__Halomonas s__unclassified_1	1291.88	445.941	4594.54	2121.03
246	p__Proteobacteria c__Gammaproteobacteria o__Oceanospirillales f__Halomonadaceae g__Halomonas s__unclassified_2	2360.91	1381.9	7187.6	3087.04
247	p__Proteobacteria c__Gammaproteobacteria o__Pseudomonadales f__Pseudomonadaceae g__Pseudomonas s__unclassified	5731.21	3451.03	5800.16	2835.63
248	p__Proteobacteria c__Gammaproteobacteria o__unclassified f__unclassified g__sfV s__unclassified	3887.65	3266.39	6638.81	8472.64
249	p__Proteobacteria c__Gammaproteobacteria o__Vibrionales f__Vibrionaceae g__Vibrio s__unclassified	5090.79	3040.34	6769.11	3456.74
250	p__Proteobacteria c__Gammaproteobacteria o__Xanthomonadales f__Xanthomonadaceae g__Dyella s__Dyella ginsengisoli	5881.01	3174.26	12048.7	7349.86
251	p__Proteobacteria c__Gammaproteobacteria o__Xanthomonadales f__Xanthomonadaceae g__Dyella s__unclassified	4174.66	3421.21	12604.9	7018.89
252	p__Proteobacteria c__Gammaproteobacteria o__Xanthomonadales f__Xanthomonadaceae g__Ignatzschineria s__unclassified	13075	4613.3	5941.26	5224.77
253	p__Proteobacteria c__Gammaproteobacteria o__Xanthomonadales f__Xanthomonadaceae g__Lysobacter s__unclassified	3725.49	3765.23	7532.52	4673.63
254	p__Proteobacteria c__Gammaproteobacteria o__Xanthomonadales f__Xanthomonadaceae g__Pseudoxanthomonas s__unclassified	8543.38	3991.78	7893.83	5299.66
255	p__Proteobacteria c__Gammaproteobacteria o__Xanthomonadales f__Xanthomonadaceae g__Rhodanobacter s__unclassified	2622.29	2111.74	6764.4	3689.06
256	p__Proteobacteria c__Gammaproteobacteria o__Xanthomonadales f__Xanthomonadaceae g__unclassified s__unclassified_1	43.8334	32.5301	6431.75	3813.16
257	p__Proteobacteria c__Gammaproteobacteria o__Xanthomonadales f__Xanthomonadaceae g__unclassified s__unclassified_2	3085.52	1489.02	7237.65	3653.11
258	p__Proteobacteria c__Gammaproteobacteria o__Xanthomonadales f__Xanthomonadaceae g__unclassified s__unclassified_3	746.376	3148.15	4010.13	1040.53
259	p__Proteobacteria c__Gammaproteobacteria o__Xanthomonadales f__Xanthomonadaceae g__unclassified s__unclassified_4	2964.57	4914.88	5634.92	2781.15
260	p__Proteobacteria c__Gammaproteobacteria o__Xanthomonadales f__Xanthomonadaceae g__Xanthomonas s__Xanthomonas axonopodis	5856.25	5902.33	8945.87	6389.91
261	p__Tenericutes c__Erysipelotrichi o__Erysipelotrichales f__Erysipelotrichaceae g__ATCC_27806 s__Eubacterium biforme_1	5703.08	2921.01	138.046	127.966
262	p__Tenericutes c__Erysipelotrichi o__Erysipelotrichales f__Erysipelotrichaceae g__ATCC_27806 s__Eubacterium biforme_2	10212	6227.86	2847.57	2620.82
263	p__Tenericutes c__Erysipelotrichi o__Erysipelotrichales f__Erysipelotrichaceae g__ATCC_27806 s__Eubacterium biforme_3	7101.33	7620.23	5341.18	4264.29
264	p__Tenericutes c__Erysipelotrichi o__Erysipelotrichales f__Erysipelotrichaceae g__Bulleidia s__p-1630-c5	1634.12	83.5034	25.8486	9.77721
265	p__Tenericutes c__Erysipelotrichi o__Erysipelotrichales f__Erysipelotrichaceae g__Catenibacterium s__unclassified	3731.05	2957.32	1263.69	798.372
266	p__Tenericutes c__Mollicutes o__RF39 f__unclassified g__sfE s__unclassified	7344.06	7898.56	6346.72	5181.74
267	p__Thermodesulfobacteria c__Thermodesulfobacteria o__Thermodesulfobacteriales f__Thermodesulfobacteriaceae g__unclassified s__unclassified	3405.38	6515.26	7936.37	6101.67
268	p__TM7 c__TM7-1 o__unclassified f__unclassified g__sfA s__unclassified	4013.65	3583.1	8889.57	9621.69
269	p__TM7 c__TM7-3 o__EW055 f__unclassified g__sfA s__unclassified	5793.9	4817.7	11648.8	8767.37
