# Supplementary material for: Bacterial community structure transformed after thermophilically composting human waste in Haiti
Source: PLoS One. 2017 Jun 1;12(6):e0177626. doi: 10.1371/journal.pone.0177626 (PMC5453478; doi:10.1371/journal.pone.0177626)
Supplement: S4 Table — Values for each stage are average probe intensities for named species-level classifications or grouped as unclassified at the species level. Last three columns contain differences calculated between compost stages; negative values indicate decreases, whereas positive values potentially indicate regrowth. Kruskal-Wallis tests for differences in relative abundance among stages and post-hoc (Dunn) tests with BH corrected p-values are given below (bold values are significant at p<0.05). (XLSX) [file pone.0177626.s005.xlsx]

## Sheet: Table S4 Enterococcus
S4 Table. Enterococcus OTU probe intensity scores (indicating relative abundances) and differences between compost stages at each location. Values for each stage are average probe intensities for named species-level classifications or grouped as unclassified at the species level. Last three columns contain differences calculated between compost stages; negative values indicate decreases, whereas …
Location	Species	Bucket	Thermo	Curing	Bagged	Bucket to Thermo	Thermo to Curing	Curing to Bagged
Cap-Haitien	Enterococcus casseliflavus	7066	3553	2944	4276	-3513	-609	1332
	Enterococcus faecalis	7458	3552	3897	4697	-3907	345	800
	Enterococcus unclassified	6698	2604	2364	3716	-4094	-240	1352
Port-au-Prince	Enterococcus casseliflavus	6439	5504	4817	4192	-935	-687	-625
	Enterococcus faecalis	6421	5694	5170	4469	-727	-524	-701
	Enterococcus unclassified	6147	4846	4203	3767	-1301	-642	-436
Kruskal-Wallis test and Dunn post-hoc test output (BH-corrected)
	Bolded values are significant at p<0.05
Location		K-W p-value
Cap-Haitien
	Enterococcus casseliflavus	0.0001295		BUCKET	THERMO	CURING
	using averages per sample for 6 OTU		BUCKET	-	-	-
			THERMO	0.00069	-	-
			CURING	0.00242	0.48835	-
			BAGGED	0.1099	0.48835	0.3867
	Enterococcus faecalis	0.0001234
	using averages per sample for 9 OTU		BUCKET	-	-	-
			THERMO	0.0001	-	-
			CURING	0.0252	0.7688	-
			BAGGED	0.1694	0.3595	0.5658
	Enterococcus unclassified	0.0001335
	using averages per sample for 63 OTU		BUCKET	-	-	-
			THERMO	0.00031	-	-
			CURING	0.006	0.75278	-
			BAGGED	0.14718	0.41365	0.41365
Port-au-Prince								Excluding SOIL_76, SOIL_77
	Enterococcus casseliflavus	0.006836		BUCKET	THERMO	CURING		0.005284		BUCKET	THERMO	CURING
	using averages per sample for 6 OTU		BUCKET	-	-	-			BUCKET	-	-	-
			THERMO	0.32	-	-			THERMO	0.195	-	-
			CURING	0.058	0.188	-			CURING	0.054	0.289	-
			BAGGED	0.017	0.061	0.607			BAGGED	0.013	0.135	0.579
	Enterococcus faecalis	0.0317						0.01931
	using averages per sample for 9 OTU		BUCKET	-	-	-			BUCKET	-	-	-
			THERMO	0.606	-	-			THERMO	0.21	-	-
			CURING	0.102	0.221	-			CURING	0.115	0.43	-
			BAGGED	0.067	0.102	0.643			BAGGED	0.041	0.21	0.618
	Enterococcus unclassified	0.05476						0.03665
	using averages per sample for 63 OTU								BUCKET	-	-	-
									THERMO	0.21	-	-
									CURING	0.12	0.5	-
									BAGGED	0.12	0.43	0.82
